# Supplementary material for: Partial functional conservation of IRX10 homologs in physcomitrella patens and Arabidopsis thaliana indicates an evolutionary step contributing to vascular formation in land plants
Source: PubMed Central journal article supplement (PMC3543728; doi:10.1186/1471-2229-13-3), 2013-01-03

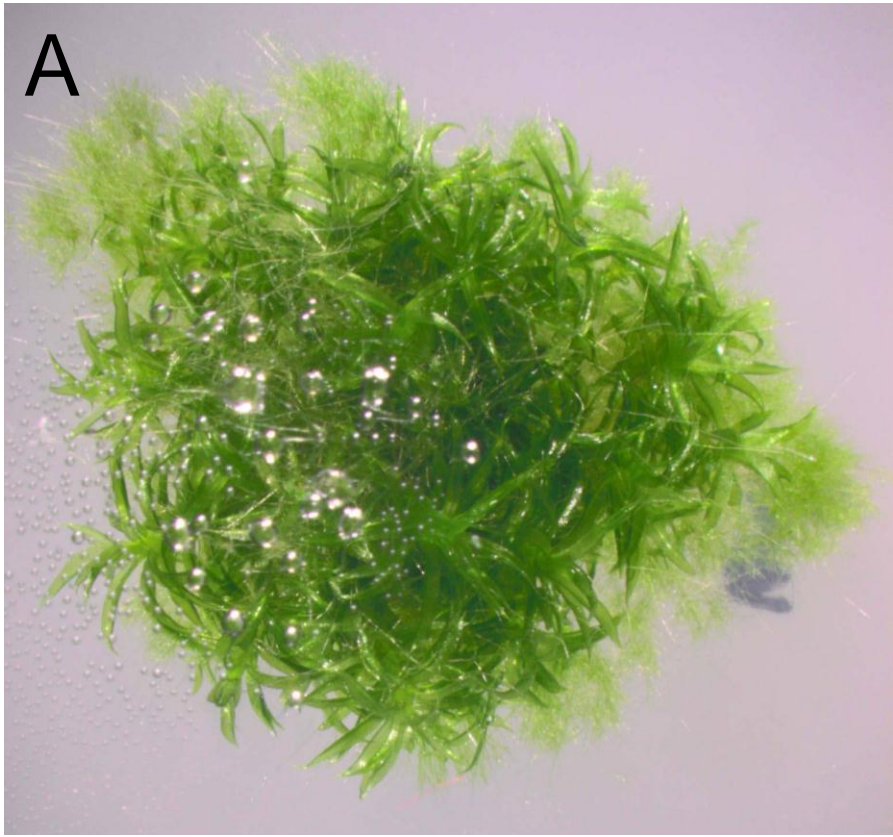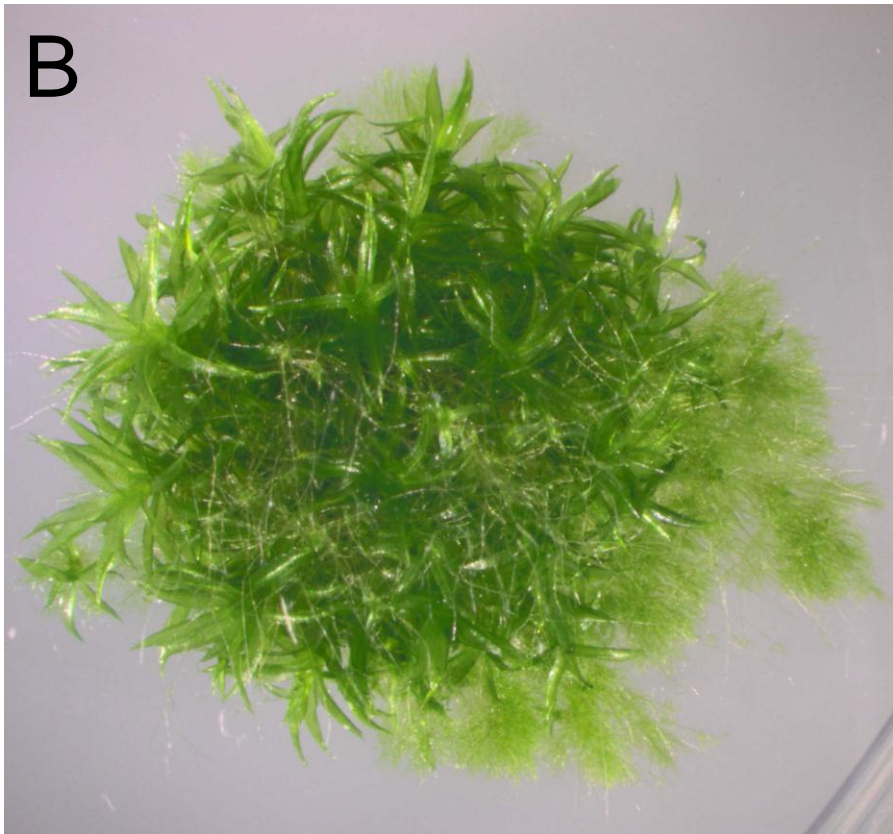

Supplement: 1471-2229-13-3-S1.pdf [file 1471-2229-13-3-S1.pdf]
